# Supplementary material for: Balloon Pulmonary Angioplasty in Technically Operable and Technically Inoperable Chronic Thromboembolic Pulmonary Hypertension
Source: PubMed Central journal article supplement (PMC7959461; doi:10.3390/jcm10051038), 2021-03-03
Supplement: jcm-10-01038-s001.pdf [file jcm-10-01038-s001.pdf]

**Supplementary Table S1. Characteristics of patients with proximal type CTEPH rejected from PEA—age, lesions position according to San Diego classification [17] assessed with pulmonary angiography, main comorbidities.**

| Patient | Age | Lesions position according to San Diego classification (right/left) | Reason for rejection from PEA      | Main comorbidities                                                                                                                                                     |
|---------|-----|---------------------------------------------------------------------|------------------------------------|------------------------------------------------------------------------------------------------------------------------------------------------------------------------|
| BK      | 54  | II/II                                                               | Patient's refusal                  | Hypothyroidism                                                                                                                                                         |
| SB      | 81  | I/II                                                                | Unfavourable risk-to-benefit ratio | prostatic cancer, COPD (C class according to GOLD), pulmonary trunk aneurysm (47mm),                                                                                   |
| ZP      | 72  | III/II                                                              | Unfavourable risk-to-benefit ratio | chronic kidney disease (stage G3b), ascending aortic aneurysm, arterial hypertension                                                                                   |
| Jl      | 85  | II/III                                                              | Unfavourable risk-to-benefit ratio | COPD with chronic respiratory insufficiency, obesity (BMI 40,3 kg/m <sup>2</sup> ), multivessel coronary artery disease                                                |
| JG      | 83  | I/III                                                               | Unfavourable risk-to-benefit ratio | Multivessel coronary artery disease, atrial fibrillation, chronic kidney disease (stage G3a)                                                                           |
| MP      | 60  | I/II                                                                | Patient's refusal                  | Chronic kidney disease (stage G3a), obesity (BMI 42,7 kg/m <sup>2</sup> ), psoriatic arthritis, hypothyroidism                                                         |
| HD      | 69  | II/III                                                              | Unfavourable risk-to-benefit ratio | Multivessel coronary artery disease, history of myocardial infarction, COPD, cardiac pacing system, arterial hypertension                                              |
| PJ      | 69  | II/III                                                              | Unfavourable risk-to-benefit ratio | Dementia syndrome, coronary artery disease, atrial fibrillation, arterial hypertension                                                                                 |
| KM      | 78  | I/III                                                               | Unfavourable risk-to-benefit ratio | History of colorectal cancer, chronic kidney disease (stage G3a), diabetes mellitus type 2, COPD, obesity (BMI: 37,7 kg/m <sup>2</sup> ), severe aortic valve stenosis |
| SG      | 83  | II/II                                                               | Unfavourable risk-to-benefit ratio | chronic kidney disease (stage G3a), atrial fibrillation, poor mobility                                                                                                 |
| HB      | 62  | II/III                                                              | Unfavourable risk-to-benefit ratio | chronic kidney disease (stage G3a), arterial hypertension, diabetes mellitus type 2, history of GI bleeding, obesity (BMI: 35,6 kg/m <sup>2</sup> )                    |
| WM      | 83  | II/I                                                                | Unfavourable risk-to-benefit ratio | Coronary artery disease, COPD                                                                                                                                          |
| ZS      | 77  | II/III                                                              | Unfavourable risk-to-benefit ratio | Multivessel coronary artery disease, COPD                                                                                                                              |

|    |    |        |                                    |                                                                                                                                                               |
|----|----|--------|------------------------------------|---------------------------------------------------------------------------------------------------------------------------------------------------------------|
| JZ | 80 | III/II | Unfavourable risk-to-benefit ratio | Arterial hypertension, diabetes mellitus type 2, chronic kidney disease (stage G3a)                                                                           |
| JB | 67 | II/II  | Unfavourable risk-to-benefit ratio | Multivessel coronary artery disease, CABG in history, history of colon cancer treated surgically, arterial hypertension, hyperthyroidism, atrial fibrillation |
| KM | 66 | III/II | Unfavourable risk-to-benefit ratio | Arterial hypertension, COPD, obesity (BMI: 36,2 kg/m <sup>2</sup> )                                                                                           |

BMI – body mass index; COPD – chronic obstructive pulmonary disease; CABG – coronary artery bypass graft; GOLD – global Initiative for Chronic Obstructive Lung Disease; GI – gastrointestinal tract; PEA – pulmonary endarterectomy

**Supplementary Table S2: Lung segments treated with BPA and balloon catheter size used .**

|                                                         | All patients (n=70) | d-CTEPH group (n=54) | p-CTEPH group (n=16) | p    |
|---------------------------------------------------------|---------------------|----------------------|----------------------|------|
| <b>Left lung</b>                                        |                     |                      |                      |      |
| Maximal diameter of balloon catheter (median; IQR) [mm] | 4.0 [3.5 - 6.0]     | 4.5 [3.5 - 6.0]      | 3.5 [2.5 - 6.0]      | 0.29 |
| LA 1+2                                                  | 38 (54%)            | 31 (55%)             | 7 (50%)              | 0.95 |
| LA3                                                     | 21 (30%)            | 18 (32%)             | 3 (21%)              | 0.65 |
| LA4                                                     | 35 (50%)            | 29 (52%)             | 6 (43%)              | 0.77 |
| LA5                                                     | 42 (60%)            | 33 (59%)             | 9 (64%)              | 0.95 |
| LA6                                                     | 37 (53%)            | 29(52%)              | 8 (57%)              | 0.90 |
| LA8                                                     | 53 (76%)            | 45 (80%)             | 8 (57%)              | 0.14 |
| LA9                                                     | 56 (80%)            | 48 (86%)             | 8 (57%)              | 0.04 |
| LA10                                                    | 53 (76%)            | 46 (82%)             | 7 (50%)              | 0.03 |
| <b>Right lung</b>                                       |                     |                      |                      |      |
| Maximal diameter of balloon catheter (median; IQR) [mm] | 5.0 [4.0 - 6.0]     | 5.0 [4.0 - 6.0]      | 5.0[4.0 - 6.0]       | 0.99 |
| RA1                                                     | 48 (69%)            | 38 (68%)             | 10 (71%)             | 0.95 |
| RA2                                                     | 48 (69%)            | 38 (68%)             | 10 (71%)             | 0.95 |
| RA3                                                     | 38 (54%)            | 31 (55%)             | 7 (50%)              | 0.95 |
| RA4                                                     | 40 (57%)            | 34 (61%)             | 6 (43%)              | 0.36 |
| RA5                                                     | 46 (66%)            | 40 (71%)             | 6 (43%)              | 0.09 |
| RA6                                                     | 39 (56%)            | 27 (48%)             | 12 (86%)             | 0.03 |
| RA7                                                     | 27 (39%)            | 25 (45%)             | 2 (14%)              | 0.07 |
| RA8                                                     | 59 (84%)            | 48 (86%)             | 11 (79%)             | 0.80 |
| RA9                                                     | 53 (76%)            | 42 (75%)             | 11 (79%)             | 0.94 |
| RA10                                                    | 57 (81%)            | 46 (82%)             | 11 (79%)             | 0.94 |

**Supplementary Table S3. Risk related to BPA treatment – procedural complications, contrast medium usage and radiation exposure**

|                                                                      | All patients<br>(377<br>procedures) | d-CTEPH<br>group<br>(297<br>procedures) | p-CTEPH<br>group<br>(80 procedures) | P    |
|----------------------------------------------------------------------|-------------------------------------|-----------------------------------------|-------------------------------------|------|
| Procedure related death                                              | 1 (0.3%)                            | 1 (0.4%)                                | 0                                   | NA   |
| Lung injury (per procedure)                                          | 23 (6.1%)                           | 19 (6.4%)                               | 4 (5%)                              | 0.44 |
| <i>mild/moderate</i>                                                 | 21 (5.6%)                           | 17 (5.7%)                               | 4 (5%)                              | 0.53 |
| <i>severe</i>                                                        | 2 (0.5%)                            | 2 (0.7%)                                | 0                                   | NA   |
| Hemoptysis (per procedure)                                           | 23 (6.1%)                           | 20 (6.7%)                               | 3 (3.8%)                            | 0.24 |
| <i>blood volume &lt; 50 ml</i>                                       | 18 (4.8%)                           | 17 (5.7%)                               | 1 (1.3%)                            | 0.07 |
| <i>blood volume &gt; 50 ml</i>                                       | 5 (1.3)                             | 3 (1.0%)                                | 2 (2.5%)                            | 0.29 |
| PA dissection (per procedure)                                        | 7 (0.3%)                            | 5 (1.7%)                                | 2 (2.5%)                            | 0.46 |
| PA perforation (per procedure)                                       | 22 (5.8%)                           | 18 (6.1%)                               | 4 (5%)                              | 0.45 |
| Mean contrast medium (per procedure) [ml]                            | 262 ± 53                            | 270 ± 52                                | 237 ± 52                            | 0.03 |
| Contrast induced nephropathy (per procedure)                         | 8 (2.1%)                            | 6 (2.0%)                                | 2 (2.5%)                            | 0.53 |
| Radiation quantity – air KERMA (per patient's treatment cycle) [mGy] | 4675 [2404-6346]                    | 4801 [2768-6308]                        | 3320 [2155-7033]                    | 0.59 |

PA - pulmonary artery
